# Systematic review of the definition and measurement of anastomotic leak after gastrointestinal surgery

J. Bruce, Z. H. Krukowski\*, G. Al-Khairy\*, E. M. Russell and K. G. M. Park\*

Departments of Public Health and \*Surgery, University of Aberdeen, Medical School, Polwarth Building, Aberdeen AB25 2ZD, UK  
Correspondence to: Ms J. Bruce (e-mail: j.bruce@abdn.ac.uk)

**Background:** Anastomotic leak after gastrointestinal surgery is an important postoperative event that leads to significant morbidity and mortality. Postoperative leak rates are frequently used as an indicator of the quality of surgical care provided. Comparison of rates between and within institutions depends on the use of standard definitions and methods of measurement of anastomotic leak. The aim of this study was to review the definition and measurement of anastomotic leak after oesophagogastric, hepatopancreaticobiliary and lower gastrointestinal surgery.

**Methods:** A systematic review was undertaken of the published literature. Searches were carried out on five bibliographical databases (Medline, Embase, The Cochrane Library, Cumulative Index for Nursing and Allied Health Literature and HealthSTAR) for English language articles published between 1993 and 1999. Articles were critically appraised by two independent reviewers and data on definition and measurement of anastomotic leak were extracted.

**Results:** Ninety-seven studies were reviewed and a total of 56 separate definitions of anastomotic leak were identified at three sites: upper gastrointestinal (13 definitions), hepatopancreaticobiliary (14) and lower gastrointestinal (29). The majority of studies used a combination of clinical features and radiological investigations to define and detect anastomotic leak.

**Conclusion:** There is no universally accepted definition of anastomotic leak at any site. The definitions and values used to measure anastomotic failure vary extensively and preclude accurate comparison of rates between studies and institutions.

Paper accepted 24 April 2001

British Journal of Surgery 2001, 88, 1157–1168

## Introduction

Leakage from an anastomosis in the gastrointestinal tract is a major complication that is often associated with increased morbidity, mortality and prolonged hospital stay. The frequency and consequences of anastomotic failure vary according to the site within the gastrointestinal tract. Anastomotic breakdown is the most important early complication after oesophageal anastomosis; incidences of up to 53 per cent have been reported<sup>1</sup>. It is also a serious complication after pancreatic surgery because dehiscence of anastomoses with autodigestion and destruction of surrounding tissue from leaking pancreatic juice is associated with a high mortality rate<sup>2</sup>. Dehiscence after colorectal anastomosis increases the perioperative mortality rate due to peritonitis and septicaemia, and adversely affects the late outcome in survivors because of increased local recurrence of carcinoma<sup>3</sup>. Anastomotic leak may be used as an indicator of the quality of surgical care, and comparisons of leak rates

may be made between and within surgical centres<sup>4</sup>. However, the accuracy of such comparisons depends on the use of standard definitions and methods of measurement.

The aim of this study was to assess, systematically, the quality of definition, measurement, reporting and monitoring of anastomotic leak in the contemporary surgical literature. The study was undertaken within a wider systematic review of surgical adverse events.

## Methods

### Search strategy

A systematic search for English language literature published between 1993 and 1999 was undertaken on five biomedical bibliographical databases: Medline, Embase, Cumulative Index for Nursing and Allied Health Literature, The Cochrane Library and HealthSTAR. Initial searches focused on the validity and reliability of

the definition and measurement of anastomotic leak. Owing to the lack of relevant literature, the search was subsequently expanded to include all prospective studies where anastomotic leak was included in the abstract, title or medical subject heading (MeSH). The final strategy consisted of textwords and MeSH terms on anastomosis (anastomosis, surgical; anastomotic leak, leakage, dehiscence, breakdown) combined with study design terms (prospective, longitudinal, follow-up, cohort studies).

Studies eligible for inclusion were those that contained a definition of anastomotic leak and/or details of clinical and radiological assessment. Articles were excluded for the following reasons: (1) retrospective study design; (2) failure to include a definition of anastomotic leak, a description of clinical features or methods used to detect leak; (3) non-gastrointestinal anastomoses; and (4) meta-analyses or review articles without inclusion of definitions, clinical features or investigations from primary studies. Reference lists from each study, review article and meta-analysis were searched for further relevant literature.

### Critical appraisal and data extraction

The remit of the study was a systematic and comprehensive review of the definition, measurement and monitoring of anastomotic leak. Explicit criteria for evaluation and critical appraisal were determined at an early stage in the review and articles were appraised by two independent reviewers. The following data were extracted: study details; surgical procedure or intervention; definition of anastomotic leak; clinical factors considered in assessment; details of investigations undertaken; details on validity, accuracy, sensitivity, specificity, inter- and intra-rater reliability, practicality and acceptability of the definition, measure or diagnostic test.

Validity is an assessment of the extent to which something measures what it purports to measure. Definitions were assessed for face validity, or clinical sense, by noting what properties of leak were included. Reliability is an assessment of the extent to which the definition and measurement of anastomotic leak are repeatable and reproducible. If a definition has poor repeatability, this will lead to poor agreement between observers or different methods of measurement. Information was extracted on whether a definition or measurement was repeated on more than one occasion and/or by more than one observer, and estimates of repeatability (intra-rater reliability) and reproducibility (inter-rater reliability) were sought (e.g.  $\kappa$  values). Finally, definitions and methods of measurement must be acceptable, comprehensible and suitable for use in the clinical setting, and so comments on the practicality of definitions or methods were recorded.

**Table 1** Anastomotic terminology

| General anastomotic terms | Grading terms               |
|---------------------------|-----------------------------|
| Leak                      | Partial leak                |
| Breakdown                 | Occult leak                 |
| Leakage                   | Complete leak               |
| Insufficiency             | Overt leak                  |
| Dehiscence                | Minor, moderate, major leak |
| Competence                | Covert leak                 |
| Suture insufficiency      | Trivial clinical leak       |
| Integrity                 | Gross leakage               |
| Suture line disruption    | Serious clinical leak       |
| Security                  | Clinically silent leak      |
| Frank clinical leak       | Free leak                   |
| Patency                   | Subclinical leak            |
| Controlled leak           | Contained leak              |
| Early leak                | Asymptomatic leak           |
| Radiological leak         | Generalized leakage         |
| Delayed or late leak      | Symptomatic leak            |
| Confirmed leak            | Localized leakage           |
|                           | Biochemical leak            |
|                           | Clinical leak               |

### Results

A total of 1908 abstracts were read and 240 articles were obtained for full critical appraisal. A large proportion of abstracts related to non-gastrointestinal anastomoses as a result of the sensitive rather than specific search strategy. Ninety-seven studies were included and the results are presented below according to broad location of surgery: upper gastrointestinal, hepatopancreaticobiliary (HPB) and lower gastrointestinal. *Table 1* illustrates the variation in terminology.

One 'standard' definition of anastomotic leak was proposed by the UK Surgical Infection Study Group (SISG) for use in clinical audit and to form the basis for meaningful comparisons<sup>5</sup>. Leak was defined as 'the leak of luminal contents from a surgical join between two hollow viscera. The luminal contents may emerge either through the wound or at the drain site, or they may collect near the anastomosis, causing fever, abscess, septicaemia, metabolic disturbance and/or multiple-organ failure. The escape of luminal contents from the site of the anastomosis into an adjacent localized area, detected by imaging, in the absence of clinical symptoms and signs should be recorded as a subclinical leak'. Although this definition was proposed in 1991, it has not been widely adopted; neither has it been used or referred to in any individual appraised study.

### Upper gastrointestinal surgery

Thirty-three studies of oesophagogastric surgery were identified, only 13 of which included a definition of anastomotic leak or described the clinical features used to

**Table 2** Overview of definition and assessment of upper gastrointestinal anastomotic leaks

| Reference                                       | Operation | Study design | Sample size | No. of leaks | Definition | Test                                       | Timing of test* |
|-------------------------------------------------|-----------|--------------|-------------|--------------|------------|--------------------------------------------|-----------------|
| Anikin <i>et al.</i> <sup>6</sup>               | OG        | Cohort       | 113         | 6 (5)        | No         | WS contrast                                | 6               |
| Choi <i>et al.</i> <sup>7</sup>                 | OG        | RCT          | 40          | 0 (0)        | Yes        | WS contrast and endoscopy                  | 7               |
| Craig <i>et al.</i> <sup>8</sup>                | OG        | RCT          | 100         | 7 (7)        | No         | Barium contrast                            | 5               |
| Curry <i>et al.</i> <sup>9</sup>                | RGB       | Cohort       | 38          | 0 (0)        | No         | None routinely                             | —               |
| Deshmane and Shinde <sup>10</sup>               | OG        | Cohort       | 75          | 5 (7)        | Yes        | Barium contrast                            | 10              |
| Fernandez-Fernandez <i>et al.</i> <sup>11</sup> | TG        | Cohort       | 101         | 5 (5)        | Yes        | Unspecified contrast                       | 7               |
| Fernandez-Fernandez <i>et al.</i> <sup>12</sup> | TG        | RCT          | 86          | 4 (5)        | Yes        | Unspecified contrast                       | 7               |
| Goel <i>et al.</i> <sup>13</sup>                | OG        | RCT          | 25          | 3 (12)       | Yes        | WS contrast                                | 5               |
| Gupta <sup>14</sup>                             | OG        | Cohort       | 250         | 38 (15)      | No         | Unspecified contrast                       | 5               |
| Gupta <i>et al.</i> <sup>15</sup>               | OG        | Cohort       | 29          | 7 (24)       | No         | Unspecified contrast                       | NS              |
| Hansson <i>et al.</i> <sup>16</sup>             | OG        | Cohort       | 53          | 14 (26)      | No         | WS contrast                                | 7               |
| Honkoop <i>et al.</i> <sup>17</sup>             | OG        | Cohort       | 269         | 60 (22)      | No         | WS contrast                                | 7–10            |
| Isozaki and Okajima <sup>18</sup>               | G         | Cohort       | 1114        | 52 (5)       | Yes        | WS contrast                                | 7–14            |
| Jacobi <i>et al.</i> <sup>19</sup>              | OG        | Cohort       | 33          | 6 (18)       | No         | WS contrast                                | 7               |
| Kuwano <i>et al.</i> <sup>20</sup>              | OG        | Cohort       | 69          | 5 (7)        | Yes        | WS contrast and Urografin infusion         | 14              |
| Law <i>et al.</i> <sup>21</sup>                 | OG        | RCT          | 122         | 4 (3)        | No         | WS contrast and endoscopy                  | 7               |
| Machens <i>et al.</i> <sup>22</sup>             | OG        | Cohort       | 12          | 6 (50)       | Yes        | WS contrast, drain amylase                 | 7               |
| Nambirajan <i>et al.</i> <sup>23</sup>          | OA        | Cohort       | 37          | 4 (11)       | Yes        | WS contrast                                | 5–7             |
| Obertop <i>et al.</i> <sup>24</sup>             | OG        | Cohort       | 10          | 7 (70)       | Yes        | Unspecified contrast and CT when suspected | —               |
| O'Rourke <i>et al.</i> <sup>25</sup>            | OG        | Cohort       | 116         | 2 (2)        | No         | WS contrast                                | 7–10            |
| Pol <i>et al.</i> <sup>26</sup>                 | TG        | Cohort       | 176         | 5 (3)        | No         | WS contrast                                | Week 2          |
| Schardey <i>et al.</i> <sup>27</sup>            | TG        | RCT          | 205         | 14 (7)       | Yes        | WS contrast or indigo carmine blue test    | 7               |
| Schilling <i>et al.</i> <sup>28</sup>           | OG        | Cohort       | 35          | 2 (6)        | No         | WS contrast                                | NS              |
| Svanes <i>et al.</i> <sup>29</sup>              | OG        | Cohort       | 83          | 5 (6)        | No         | WS contrast                                | 8–10            |
| Swails <i>et al.</i> <sup>30</sup>              | OG        | RCT          | 25          | 3 (12)       | No         | WS contrast                                | 4–5             |
| Thiede <i>et al.</i> <sup>31,†</sup>            | OG        | RCT          | 1042        | 6 (1)        | Yes        | WS contrast                                | 8               |
| Thomas <i>et al.</i> <sup>32</sup>              | CI        | Cohort       | 60          | 10 (17)      | No         | WS contrast                                | 8–12            |
| Trentino <i>et al.</i> <sup>33</sup>            | OG        | Cohort       | 39          | 4 (10)       | No         | WS contrast                                | 8–9             |
| van Lanschot <i>et al.</i> <sup>34</sup>        | OG        | RCT          | 60          | 14 (23)      | No         | WS contrast                                | 7               |
| Vigneswaran <i>et al.</i> <sup>35</sup>         | OG        | Cohort       | 131         | 32 (24)      | No         | WS contrast                                | 7               |
| Wu <i>et al.</i> <sup>36</sup>                  | G         | Cohort       | 474         | 24 (5)       | No         | WS contrast                                | NS              |
| Zieren <i>et al.</i> <sup>37</sup>              | OG        | RCT          | 107         | 20 (19)      | Yes        | WS contrast                                | 7               |
| Zilling <i>et al.</i> <sup>38</sup>             | TG        | Cohort       | 174         | 20 (11)      | No         | WS contrast                                | 4–7             |

Definition or description of clinical assessment given in text. Values in parentheses are percentages. \*Day or week after operation. †Upper and lower gastrointestinal procedures performed, but results for upper only presented here. WS, water-soluble; NS, not specified; OG, oesophagectomy or oesophagogastrrectomy; G, gastrectomy; TG, total gastrectomy; OVA, oesophagovisceral anastomosis; RGB, resectional gastric bypass; OA, repair of oesophageal atresia; CI, colon interposition; RCT, randomized clinical trial; CT, computed tomography

judge anastomotic failure (Table 2). The clinical features used to assess upper gastrointestinal leak included: evidence of haematoma or seroma formation at the neck wound<sup>7</sup>; septicaemia<sup>24</sup>; peritonitis<sup>18</sup>; perianastomotic collection<sup>10</sup>; leak at the neck site<sup>13</sup>; local inflammation at anastomotic site or if air or saliva was found in the cervical drain bag<sup>22</sup>; and saliva in the chest drain, mediastinitis or abscess, pneumothorax, empyema<sup>23</sup>.

Six studies relied on radiological extravasation of contrast medium<sup>11,12,18,23,27,37</sup>. The majority of studies reported routine postoperative use of radiographic water-soluble contrast swallows. Two groups of authors reported routine use of barium solution<sup>8,10</sup> and one group reported routine postoperative endoscopy with contrast studies<sup>7</sup>. The timing of administration of routine radiological tests ranged from 3 to 14 days after operation. Three studies conducted

radiological investigation only when a leak was suspected clinically<sup>9,24,39</sup>.

Five sets of authors proposed systems for classifying upper gastrointestinal leaks (Table 2). In general, an attempt was made to separate minor (detected radiologically) leaks from more major (clinically apparent) leaks<sup>10,18,23</sup>. Similarly, Csendes *et al.*<sup>40</sup> classified the radiological appearance of leakage as type I (localized) or type II (a great dissemination or diffusion to the pleural or abdominal cavities). These two types roughly correspond with the clinical and subclinical groups proposed by other authors. A meta-analysis by Bardini *et al.*<sup>1</sup> adds additional refinements to the above systems by defining four types of leak (Table 3). While the addition of a group including ‘total disruption of the anastomosis resulting from an inadequate blood supply’ is useful from the point of subsequent management, it

**Table 3** Upper gastrointestinal classification systems

| Reference                              | Grading                  | Description                                                                                                                                                                                              |
|----------------------------------------|--------------------------|----------------------------------------------------------------------------------------------------------------------------------------------------------------------------------------------------------|
| Bardini <i>et al.</i> <sup>1</sup>     | Radiological or minor    | Asymptomatic and diagnosed only at radiographic check                                                                                                                                                    |
|                                        | Clinical or moderate     | Presence of fever, leucocytosis and local signs of inflammation                                                                                                                                          |
|                                        | Serious                  | Usually an early leak with severe disruption of the anastomosis                                                                                                                                          |
|                                        | Necrosis                 | Total disruption of the anastomosis resulting from an inadequate blood supply to the viscus sutured to the oesophagus and ischaemia of the area bordering the anastomosis                                |
| Csendes <i>et al.</i> <sup>40</sup>    | Type I subclinical       | A local fistula involving the anastomosis, with no spillage or dissemination through a fistulous tract to the pleural or abdominal cavity, or the appearance of contrast material in any abdominal drain |
|                                        | Type II clinical         | A leakage with great dissemination or diffusion to the pleural or abdominal cavity with the appearance of contrast medium in any of the abdominal drains                                                 |
| Deshmane and Shinde <sup>10</sup>      | Small leak, asymptomatic | Detected only at radiological study                                                                                                                                                                      |
|                                        | Large leak, clinical     | Perianastomotic collection manifested clinically                                                                                                                                                         |
| Isozaki and Okajima <sup>18</sup>      | Minor                    | Leakage of contrast medium recognized radiologically as a fringe-like image from the anastomotic site or limited to a small area around the anastomotic site, but no leakage recognized from drain       |
|                                        | Major                    | Visualization of extensive intra-abdominal contrast medium radiologically and leakage of contrast medium from the drain, or cases where symptoms of peritonitis required the insertion of a new drain    |
| Nambirajan <i>et al.</i> <sup>23</sup> | Incidental               | Small radiological leak, no clinical symptoms                                                                                                                                                            |
|                                        | Minor                    | Saliva in chest drain, but clinically well                                                                                                                                                               |
|                                        | Major                    | Mediastinitis or abscess, pneumothorax, empyema, radiologically confirmed major oesophageal disruption                                                                                                   |

**Table 4** Definition and assessment of hepatopancreaticobiliary anastomotic leaks

| Reference                            | Operation | Study design | Sample size | No. of leaks | Definition* Test                                                                                               |
|--------------------------------------|-----------|--------------|-------------|--------------|----------------------------------------------------------------------------------------------------------------|
| Bottger <i>et al.</i> <sup>41</sup>  | P         | Cohort       | 221         | 28 (13)      | Yes<br>Amylase and drain fluid levels; relaparotomy                                                            |
| Chou <i>et al.</i> <sup>42</sup>     | P         | RCT          | 93          | 9 (10)       | Yes<br>Amylase and drain fluid levels                                                                          |
| Davidson <i>et al.</i> <sup>43</sup> | OLT       | RCT          | 100         | 17 (17)      | Yes<br>Routine retrograde cholangiography on day 10–14 after operation                                         |
| Evans <i>et al.</i> <sup>44</sup>    | P         | Cohort       | 63          | 7 (11)       | Yes<br>Amylase and drain fluid levels                                                                          |
| Gupta <i>et al.</i> <sup>45</sup>    | BDI       | Cohort       | 13          | 3 (23)       | Yes<br>Biliary nucleotide scintigraphy and transhepatic cholangiography (timing not stated)                    |
| Hamanaka and Suzuki <sup>46</sup>    | P         | Cohort       | 48          | 2 (4)        | Yes<br>Routine Gastrografin swallow (day 7); amylase and drain fluid levels                                    |
| Hardy <i>et al.</i> <sup>47</sup>    | OLT       | Cohort       | 129         | 7 (5)        | Yes<br>Cholangiography or percutaneous transhepatic cholangiography (day 7)                                    |
| Howard <sup>48</sup>                 | P         | Cohort       | 56          | 0 (0)        | Yes<br>Amylase and drain fluid levels                                                                          |
| Kapoor <i>et al.</i> <sup>49</sup>   | CJ        | Cohort       | 41          | 6 (15)       | No<br>Isotope hepatobiliary scanning (timing not stated)                                                       |
| Kayahara <i>et al.</i> <sup>2</sup>  | P         | Cohort       | 150         | 43 (29)      | Yes<br>Drain fluid amylase content and radiological confirmation of pancreatic ductography (timing not stated) |
| Lowy <i>et al.</i> <sup>50</sup>     | P         | RCT          | 110         | 27 (25)      | Yes<br>Amylase and drain fluid levels                                                                          |
| Matsusue <i>et al.</i> <sup>51</sup> | P         | Cohort       | 100         | 9 (9)        | Yes<br>Amylase and drain fluid levels                                                                          |
| Nagakawa <i>et al.</i> <sup>52</sup> | P         | Cohort       | 64          | 10 (16)      | Yes<br>Urinary and serum amylase levels                                                                        |
| Reissman <i>et al.</i> <sup>53</sup> | P         | Cohort       | 35          | 5 (14)       | Yes<br>Amylase and drain fluid levels                                                                          |
| Roder <i>et al.</i> <sup>54</sup>    | P         | Cohort       | 85          | 15 (18)      | Yes<br>Radiologically documented leaks; amylase and drain fluid levels                                         |

Values in parentheses are percentages. \*Definition or a description of investigation performed to detect leak. BDI, bile duct injury; CJ, cholangiojejunostomy; OLT, orthotopic liver transplantation; P, pancreatic surgery; RCT, randomized clinical trial

requires the use of endoscopy to verify an area of necrosis. Clearly, the more severe leaks have the least favourable outcome.

### Hepatopancreaticobiliary surgery

Fifteen studies related to HPB surgery were eligible for inclusion: pancreatic surgery (11 studies), orthotopic liver

transplant (two), cholangiojejunostomy (one) and bile duct injury (one). Fourteen of the 15 studies included a clear definition of HPB leak or described the investigations undertaken to detect leak (Table 4). The clinical signs extracted from individual studies included: peritonitis, pyrexia, sepsis<sup>46</sup>; bile drainage from drains placed at anastomosis area<sup>45</sup>; fever, raised leucocyte count, sepsis<sup>54</sup>. Kayahara *et al.*<sup>2</sup> accepted 'drainage of bile or enteric fluid

**Table 5** Pancreatic surgery leak values

| Reference                            | Description                | Drain fluid volume                                                             | Amylase value                                                                | Timing                        |
|--------------------------------------|----------------------------|--------------------------------------------------------------------------------|------------------------------------------------------------------------------|-------------------------------|
| Bottger <i>et al.</i> <sup>41</sup>  | Pancreatic fistula         | —                                                                              | Drain fluid amylase level >2000 units/l                                      | Daily                         |
| Chou <i>et al.</i> <sup>42</sup>     | Pancreatic leak or fistula | Persistent drainage > 50 ml/day                                                | Amylase-rich drain fluid                                                     | Daily for > 2 weeks           |
| Evans <i>et al.</i> <sup>44</sup>    | Pancreatic fistula         | > 50 ml/day                                                                    | Abdominal fluid level > 1000 units/l                                         | Daily                         |
| Hamanaka and Suzuki <sup>46</sup>    |                            | Volume measured daily                                                          | —                                                                            | Daily                         |
| Howard <sup>48</sup>                 | Pancreatic fistula         | Peritoneal drain and pancreatic tube fluid assessed                            | Serum amylase level > 3 times normal; amylase levels in drain and tube fluid | 2-day intervals for 8–12 days |
| Kayahara <i>et al.</i> <sup>2</sup>  | Dehiscence                 | Drain removed when < 50 ml/day                                                 | Amylase in drain fluid > 3 times serum amylase level                         | Daily                         |
| Lowy <i>et al.</i> <sup>50</sup>     | Clinical leak              | Drain removed day 3 if < 200 ml/day and amylase level normal                   | > 2.5 times upper limit of normal in serum                                   | Daily                         |
|                                      | Biochemical leak           | Drain fluid on or after day 3 that was asymptomatic and resolved spontaneously | > 2.5 times upper limit of normal for serum                                  | Daily                         |
| Matsusue <i>et al.</i> <sup>51</sup> | Peripancreatic sepsis      | Prolonged suppurative discharge < 50 ml/day                                    | Low amylase drain fluid level < 1000 units for > 1 week                      | Daily                         |
|                                      | Pancreatic fistula         | Prolonged suppurative discharge > 50 ml/day                                    | High amylase drain fluid level of > 1000 units for > 1 week                  | Daily                         |
| Nagakawa <i>et al.</i> <sup>52</sup> | Pancreatic leak            | —                                                                              | High urinary or serum amylase level for 3 days or more                       | Daily                         |
| Reissman <i>et al.</i> <sup>53</sup> | Pancreatic leak            | Peripancreatic drain fluid for > 7 days                                        | Amylase-rich fluid $\geq$ 40 ml/day (> 10 times normal plasma level)         | Daily                         |
| Roder <i>et al.</i> <sup>54</sup>    | Pancreatic fistula         | Fluid collection of > 50 ml during entire postoperative course                 | Drain fluid amylase content > 3 times serum amylase level                    |                               |

from the drain, the detection of enteric bacteria in the drainage fluid, radiographic confirmation of dehiscence of pancreatic ductography, or an amylase level in the drainage fluid of > 3 times the serum amylase level'. Each of the studies involving pancreatic surgery defined a leak by the volume of drain output and/or drain fluid enzyme concentrations (Table 5). There was considerable variation in fluid volume, values and the timing of test administration between individual studies.

Two HPB classification systems were identified<sup>50,51</sup>. Matsusue *et al.*<sup>51</sup> distinguished between peripancreatic sepsis and a pancreatic fistula, based on amylase content and level of drainage fluid in patients undergoing pancreaticojejunostomy. In a randomized controlled trial of octreotide after pancreaticoduodenectomy, Lowy *et al.*<sup>50</sup> gave clear criteria for clinical and biochemical pancreatic leaks. A clinical pancreatic anastomotic leak was defined as the drainage of amylase-rich fluid (more than 2.5 times the upper limit of normal for serum amylase) in association with fever (above 38°C), leucocytosis (white blood cell count greater than 10 000 per litre), sepsis (haemodynamic instability requiring transfer to the intensive care unit) or the need for percutaneous drainage of an amylase-rich fluid collection. A biochemical pancreatic leak was defined as a raised level of amylase (more than 2.5 times the upper limit of normal for serum amylase) in the drain fluid on or after postoperative day 3 that was asymptomatic and resolved

spontaneously. This was the only study with distinct parameters for sepsis, leucocytosis and fever.

One review was identified that examined the efficacy of octreotide, a potent inhibitor of exocrine pancreatic secretion, in reducing postoperative complications<sup>55</sup>. The authors distinguished between pancreatic leakage and pancreatic fistula, where leakage was defined as 'leakage from pancreatic, biliary, or intestinal anastomosis as determined by radiographic or intraoperative findings/relaparotomy'. A pancreatic fistula was diagnosed 'if (1) the concentrations of amylase and lipase in the drainage fluid were > 3 times higher than in the serum of *n* [not specified by authors] consecutive postoperative days and (2) a drainage volume of > 10 ml/24 h was present. The serum and drainage fluid amylase and/or lipase concentration were determined on postoperative days 1, 3, 4, 5 and 7 and twice weekly thereafter'. However, only two of the original seven controlled trials had used these standard definitions.

### Lower gastrointestinal surgery

A total of 49 lower gastrointestinal studies were eligible for inclusion, 29 of which included a definition (Table 6). The clinical signs and symptoms most frequently described included: signs of localized or generalized peritonitis (12 studies); faecal discharge from the wound and/or drain (11);

**Table 6** Definition and assessment of lower gastrointestinal anastomotic leaks

| Reference                              | Operation | Study design | Sample size | No. of leaks | Definition | Test                                                                       | Timing                                                                         |
|----------------------------------------|-----------|--------------|-------------|--------------|------------|----------------------------------------------------------------------------|--------------------------------------------------------------------------------|
| Ambrosetti <i>et al.</i> <sup>56</sup> | CR        | Cohort       | 199         | 5 (3)        | No         | WS contrast                                                                | Routine on day 9–11                                                            |
| Biondo <i>et al.</i> <sup>57</sup>     | CR        | Cohort       | 63          | 3 (5)        | No         | Unspecified contrast                                                       | When suspected                                                                 |
| Bokey <i>et al.</i> <sup>58</sup>      | C/CR      | Cohort       | 1846        | 79 (4)       | Yes        | WS contrast, abdominal reoperation                                         | When suspected                                                                 |
| Bouillot <i>et al.</i> <sup>59</sup>   | C         | Cohort       | 50          | 1 (2)        | No         | Unspecified radiography                                                    | Unclear                                                                        |
| Burke <i>et al.</i> <sup>60</sup>      | CR        | RCT          | 186         | 7 (4)        | Yes        | WS contrast                                                                | Routinely on day 7 in first half of study, then changed to when leak suspected |
| Cornwell <i>et al.</i> <sup>61</sup>   | C         | Cohort       | 56          | 3 (5)        | Yes        | Surgical re-exploration, CT or WS contrast                                 | Variable                                                                       |
| De Wever <i>et al.</i> <sup>62</sup>   | CR        | Cohort       | 16          | 5 (31)       | No         | Endoscopy and unspecified radiological test                                | 3–4 months                                                                     |
| Debus <i>et al.</i> <sup>63</sup>      | CR        | Cohort       | 77          | 6 (8)        | No         | Barium contrast                                                            | When suspected                                                                 |
| Deen and Smart <sup>64</sup>           | C         | Cohort       | 53          | 2 (4)        | Yes        | Unspecified radiography                                                    | When suspected                                                                 |
| Dehni <i>et al.</i> <sup>65</sup>      | CR        | Cohort       | 258         | 31 (12)      | Yes        | WS contrast, imaging or reoperation                                        | Routine contrast study 8–10 weeks before stoma                                 |
| Docherty <i>et al.</i> <sup>66</sup>   | CR        | RCT          | 652         | 38 (6)       | Yes        | WS contrast, reoperation                                                   | Routine on day 4–14                                                            |
| Fingerhut <i>et al.</i> <sup>67</sup>  | CR        | RCT          | 159         | 10 (6)       | Yes        | WS contrast, sinography                                                    | Routine contrast study on day 7                                                |
| Fingerhut <i>et al.</i> <sup>68</sup>  | CR        | RCT          | 113         | 17 (15)      | Yes        | WS contrast, sinography, reoperation                                       | Routine contrast study on day 7                                                |
| Hallbook <i>et al.</i> <sup>69</sup>   | CR        | RCT          | 97          | 9 (9)        | Yes        | Digital and endoscopic examination, contrast, reoperation, CT              | Routine contrast study before stoma closure                                    |
| Hansen <i>et al.</i> <sup>70</sup>     | CR        | Cohort       | 615         | 9 (1)        | Yes        | Unspecified radiography                                                    | When suspected                                                                 |
| Hida <i>et al.</i> <sup>71</sup>       | CR        | RCT          | 43          | 2 (5)        | No         | WS contrast                                                                | Routinely at 2 months                                                          |
| Iversen <i>et al.</i> <sup>72</sup>    | CR        | Cohort       | 161         | 17 (11)      | No         | WS contrast                                                                | When suspected                                                                 |
| Junger <i>et al.</i> <sup>73</sup>     |           |              |             |              | Yes        | LPS concentration                                                          | LPS level assessed daily                                                       |
| Karanjia <i>et al.</i> <sup>74</sup>   | CR        | Cohort       | 219         | 38 (17)      | Yes        | WS contrast                                                                | When suspected                                                                 |
| Kessler <i>et al.</i> <sup>75</sup>    | CR        | MRCT         | 621         | 88 (14)      | Yes        | Unspecified radiological tests, methylene blue test                        | When suspected                                                                 |
| Kockerling <i>et al.</i> <sup>76</sup> | CR        | MRCT         | 949         | 46 (5)       | No         | Unspecified                                                                | Unspecified                                                                    |
| Kracht <i>et al.</i> <sup>77</sup>     | C         | MRCT         | 440         | 31 (7)       | Yes        | WS contrast, reoperation                                                   | Routine contrast on day 8–10                                                   |
| Mann <i>et al.</i> <sup>78</sup>       | CR        | Cohort       | 370         | 11 (3)       | Yes        | WS contrast                                                                | When suspected                                                                 |
| Merad <i>et al.</i> <sup>79</sup>      | CR        | RCT          | 705         | 53 (8)       | Yes        | WS contrast, reoperation                                                   | Routine contrast on day 8                                                      |
| Merad <i>et al.</i> <sup>80</sup>      | CR        | RCT          | 494         | 32 (6)       | Yes        | WS contrast, reoperation                                                   | Routine contrast on day 7                                                      |
| Miller <i>et al.</i> <sup>81,82</sup>  | CR        | Cohort       | 103         | 6 (6)        | Yes        | WS contrast                                                                | Routine contrast on day 10                                                     |
| Moore <i>et al.</i> <sup>83</sup>      | CR        | Cohort       | 300         | 34 (11)      | No         | Unspecified radiological examination, reoperation (clinically significant) | Routine before stoma closure                                                   |
| Norris <i>et al.</i> <sup>84</sup>     | L         | Cohort       | 156         | 6 (4)        | No         | Unspecified imaging or reoperation                                         | When suspected                                                                 |
| Pakkastie <i>et al.</i> <sup>85</sup>  | CR        | RCT          | 38          | 15 (39)      | Yes        | WS contrast                                                                | Routine contrast on day 7–10                                                   |
| Petersen <i>et al.</i> <sup>3</sup>    | CR        | Cohort       | 467         | 41 (9)       | Yes        | WS contrast                                                                | When suspected                                                                 |
| Redmond <i>et al.</i> <sup>86</sup>    | CR        | Cohort       | 111         | 13 (12)      | Yes        | WS contrast                                                                | Routine contrast on day 10–12                                                  |
| Sagar <i>et al.</i> <sup>87</sup>      | CR        | RCT          | 100         | 12 (12)      | Yes        | WS contrast                                                                | Routine contrast on day 5–7                                                    |
| Santos <i>et al.</i> <sup>88</sup>     | CR        | RCT          | 149         | 11 (7)       | Yes        | Unspecified radiological examination                                       | When suspected                                                                 |
| Slim <i>et al.</i> <sup>89</sup>       | Lap CR    | Cohort       | 65          | 6 (9)        | Yes        | WS contrast, reoperation for peritonitis                                   | When suspected                                                                 |
| Stewart <i>et al.</i> <sup>90</sup>    | CR        | RCT          | 88          | 1 (1)        | Yes        | Unspecified                                                                | Unspecified                                                                    |
| Tagart <sup>91</sup>                   | CR        | Cohort       | 220         | 79 (36)      | No         | Limited barium contrast                                                    | Routine contrast on day 14                                                     |
| Thompson <i>et al.</i> <sup>4</sup>    | CR        | Cohort       | 535         | 18 (3)       | No         | None                                                                       | Unspecified (not done routinely)                                               |
| Watson <i>et al.</i> <sup>92</sup>     | C/CR      | Cohort       | 477         | 9 (2)        | No         | WS contrast                                                                | When suspected                                                                 |
| Wheeler and Gilbert <sup>93</sup>      | CR        | Cohort       | 102         | 7 (7)        | No         | WS contrast                                                                | Routine contrast on day 8                                                      |

Values in parentheses are percentages. C, colonic resection; CR, colorectal surgery; CT, computed tomography; L, laparotomy (for Crohn's disease); Lap, laparoscopic; LPS, lipopolysaccharide; MRCT, multi-randomized clinical trial; RCT, randomized clinical trial; WS, water-soluble

abscess (ten); purulent discharge from drain, wound or anus (seven); and fever (six). Some studies defined a clinical anastomotic leak as that requiring reoperation<sup>83,86</sup>, whereas others accepted signs of leakage without further surgery. None of the studies defined peritonitis.

The majority of lower gastrointestinal series used contrast (water-soluble) radiography, either routinely or

when a leak was suspected. Assessment of timing of administration was often difficult to interpret as some authors combined leak results from routine investigation with those conducted when leak was suspected. The timing of administration of routine contrast ranged from day 4 to day 14 after operation, although timing was later in patients with an ileoanal pouch (*Table 7*).

**Table 7** Definition and assessment of ileoanal pouch leaks

| Reference                              | Operation        | Study design | Sample size | No. of leaks | Definition | Test                                                                                        | Timing                                                                   |
|----------------------------------------|------------------|--------------|-------------|--------------|------------|---------------------------------------------------------------------------------------------|--------------------------------------------------------------------------|
| Breen <i>et al.</i> <sup>94</sup>      | IPAA             | Cohort       | 628         | 28 (4)       | Yes        | WS contrast                                                                                 | Routinely before stoma closure                                           |
| Dayton and Larsen <sup>95</sup>        | IPAA             | Cohort       | 510         | 21 (4)       | Yes        | —                                                                                           | Unclear                                                                  |
| Flohr <i>et al.</i> <sup>96</sup>      | Ileal neobladder | Cohort       | 306         | 1 (0)        | No         | Multiple investigations performed (ileal neobladder); IVP and voiding cystography at 1 year | Routine IVP and cystography at 1 year                                    |
| Hrung <i>et al.</i> <sup>97</sup>      | IPAA             | Cohort       | 37          | 3 (8)        | Yes        | WS and/or barium contrast                                                                   | Routine imaging at 8–12 weeks                                            |
| Hulten <sup>98</sup>                   | IPAA             | Cohort       | 307         | 31 (10)      | Yes        | Endoscopy and radiological examination                                                      | Routine contrast 6–8 weeks before closure of ileostomy or when suspected |
| Kartheuser <i>et al.</i> <sup>99</sup> | IPAA             | Cohort       | 171         | 2 (1)        | No         | Unspecified radiological investigation under general anaesthesia                            | 2 months                                                                 |
| Kelly <i>et al.</i> <sup>100</sup>     | IPAA             | Cohort       | 85          | 10 (12)      | Yes        | Unspecified contrast                                                                        | 5–6 weeks before stoma closure                                           |
| Richard <i>et al.</i> <sup>101</sup>   | Pelvic pouch     | Cohort       | 753         | 91 (12)      | No         | WS contrast or CT with contrast                                                             | Unspecified                                                              |
| Wexner <i>et al.</i> <sup>102</sup>    | IAA              | Cohort       | 83          | 0 (0)        | No         | Unspecified contrast                                                                        | Routine contrast before stoma closure, time not specified                |

Values in parentheses are percentages. CT, computed tomography; IAA, ileoanal anastomosis; IPAA, ileal pouch–anal anastomosis; IVP, intravenous pyelography; WS, water-soluble

## Discussion

This review identified a total of 56 definitions of anastomotic leak from 97 studies but failed to identify any formal validity evaluation of the identified definitions and classifications. Although a standard definition for anastomotic leak was proposed by a UK multidisciplinary group (SISG)<sup>5</sup>, this definition was not used or referred to by any of the appraised studies, perhaps because it is too general for use in different clinical situations. Other studies have developed definitions and grading systems specific to parts of the gastrointestinal tract and so studies were subdivided in the review by the location of surgery.

In the 33 papers reviewed that involved oesophagogastric surgery, the grading systems for leakage contained components similar to those in the SISG definition: fever, abscess and organ failure. Most authors reported using routine water-soluble contrast investigation in the first postoperative week. Rates of postoperative leaks may be influenced according to timing of administration and standard procedures and/or protocols. The postoperative leak rates for 31 upper gastrointestinal studies (excluding two containing fewer than 12 patients<sup>22,24</sup>) ranged from 0 to 26 per cent. Although Curry *et al.*<sup>9</sup> reported no postoperative leaks, routine postoperative radiography was not performed and asymptomatic leaks could not have been detected.

Following biliary and pancreatic anastomoses, leakage of bile and pancreatic fluid is common but not clinically relevant if there are no untoward clinical symptoms. Such leakage in the first few days after operation ceases spontaneously. Excess and/or prolonged drainage of fluid

has been used in HPB studies. However, the values for drainage volume and enzyme concentration required to diagnose clinically significant leakage varied considerably between centres. For example, drain fluid amylase levels ranged from 2.5 to 10 times normal plasma levels. In studies of pancreatic surgery, leak rates ranged from 0 to 29 per cent. Furthermore, the arbitrary levels of drainage volume and amylase content used by some authors will be greatly influenced by the use of octreotide, which effectively eliminates pancreatic exocrine function, and the concentration of enzymes in drain fluid.

There were more clinical trials and larger sample sizes in the studies of lower gastrointestinal surgery. The German Colorectal Carcinoma Study Group reported leak rates in a large cohort based on clinical assessment of leak without radiological confirmation<sup>75</sup>. Results were presented according to individual criteria for faecal fistula, local abscess and peritonitis, with overall anastomotic leak rates. The presentation of individual features of clinical leakage permits intra- and inter-institutional comparison. While the rate of leakage increases with lower anastomoses, and this may make direct examination easier, the level of a colorectal anastomosis does not influence the definition or diagnosis of a leak. Overall, clinical features were used more commonly for diagnosis in the lower gastrointestinal studies than in studies of upper gastrointestinal and HPB surgery. The definitions of leak after bowel surgery usually included peritonitis (localized or generalized), faecal or purulent drainage from the wound and/or drain, presence of an abscess, and fever. Fifteen lower gastrointestinal reports in this review described routine contrast examination during the first or second postoperative week to determine

**Table 8** Components of definition of anastomotic leak by anatomical site

| Grade                | Symptoms and signs                                                                                                                                                                                                                                                         | Management                                                                                                        |
|----------------------|----------------------------------------------------------------------------------------------------------------------------------------------------------------------------------------------------------------------------------------------------------------------------|-------------------------------------------------------------------------------------------------------------------|
| <b>Upper GI leak</b> |                                                                                                                                                                                                                                                                            |                                                                                                                   |
| Radiological         | Detected only on routine imaging; no clinical signs                                                                                                                                                                                                                        | No change in management                                                                                           |
| Clinical minor       | Presence of luminal contents through the drain or wound site causing local inflammation, e.g. fever (temperature > 38°C) or leucocytosis (white cell count > 10 000/litre).<br>Leak may also be detected on imaging studies                                                | No change in management or intervention but may have prolonged hospital stay and/or delay in resuming oral intake |
| Clinical major       | As clinical minor. Severe disruption to anastomosis.<br>Leak may also be detected on imaging studies                                                                                                                                                                       | Change in management and intervention required                                                                    |
| <b>HPB leak</b>      |                                                                                                                                                                                                                                                                            |                                                                                                                   |
| Radiological         | Detected only on routine imaging study. No clinical signs                                                                                                                                                                                                                  | No change in immediate management                                                                                 |
| Clinical minor       | Leakage defined if persistent drainage of > 50 ml per day via drain or serum amylase level > 2 times normal or signs of fever (temperature > 38°C) or leucocytosis (white cell count > 10 000/litre). Leak may also be detected on imaging studies                         | No change in management or intervention. May have prolonged hospital stay                                         |
| Clinical major       | As clinical minor. Severe disruption to anastomosis.<br>Leak may also be detected on imaging studies                                                                                                                                                                       | Change in management and intervention required                                                                    |
| <b>Lower GI leak</b> |                                                                                                                                                                                                                                                                            |                                                                                                                   |
| Radiological         | Detected only on routine study. No clinical signs                                                                                                                                                                                                                          | No change in management                                                                                           |
| Clinical minor       | Presence of luminal contents through the drain or wound site causing local inflammation, e.g. fever (temperature > 38°C), leucocytosis (white cell count > 10 000/litre), faecal discharge from wound or drain or abscess.<br>Leak may also be detected on imaging studies | No change in management or intervention but may have prolonged hospital stay                                      |
| Clinical major       | As clinical minor. Severe disruption to anastomosis.<br>Leak may also be detected on imaging studies                                                                                                                                                                       | Change in management and intervention required                                                                    |

GI, gastrointestinal; HPB, hepatopancreaticobiliary

anastomotic integrity. Such tests are no longer routine in most practices because of the clinical irrelevance of occult leaks and the small risk of radiological investigation<sup>60</sup>.

The Australian Council of Healthcare Standards accepted anastomotic leak as a clinical outcome indicator for colorectal carcinoma resection on the basis that clinical leaks are 'easily identifiable'<sup>103</sup>. However, clear, well defined criteria must be agreed on to ensure that postoperative leak prevalence rates are directly comparable. At present, there is considerable variation in the definition and interpretation of clinical leakage and, until single definitions are adopted, it is unlikely that inter-institutional comparisons are valid. Validity assessment is hampered by the lack of a standard definition that has been accepted by surgeons. The majority of the definitions require subjective assessment, particularly the definitions in lower bowel surgery, which tend to depend on clinical judgement. These definitions will be subject to variation in interpretation, as clinical assessment is likely to be made by more than one member of a surgical team over a period of hospital stay. Assessment and diagnosis of anastomotic leak may differ between surgeons according to grade and experience. No formal assessment of inter-rater reliability was found in this review. The application of a single definition of anastomotic

leak by two independent assessors to the same group of patients would allow assessment of reproducibility (inter-rater reliability). Statistical estimates of agreement between assessors using definitions of other postoperative surgical events (e.g. wound infection, deep vein thrombosis) have been conducted, but this systematic review failed to find evidence of similar work for anastomotic leak.

There was no chronological element in the definitions of anastomotic leakage, as is routine for postoperative mortality (30-day cut-off) or late wound infection detected after discharge from hospital (30 days). This criterion should be considered for inclusion in the definition of anastomotic leakage because such leakage may become apparent only after discharge from hospital. Readmission may be required because of sepsis or fistula formation but occasionally leakage that was clinically occult may be demonstrated on routine contrast radiology performed, for example, before closure of a stoma. It seems logical to categorize leaks according to timing of presentation. A number of patients will die after an operation that included an intestinal anastomosis, but not all will have had anastomotic integrity confirmed before death by contrast radiology. In some of these patients an autopsy will reveal occult leakage or confirm suspected leakage. The post-



mortem examination rate for patients who die after anastomotic surgery should be stated in all reports.

The SISG definition of anastomotic leak is useful as a generic definition. Table 8 shows a proposal for three definitions specific to anatomical site, based on components from the SISG definition and those identified in the systematic review. These definitions include signs and symptoms, level of severity, and components of clinical management. In essence, any leak that requires a change in management, including prescription of antibiotics, with subsequent delay in the reintroduction of oral intake or discharge from hospital, would be considered a major clinical leak. The definitions proposed in this review may stimulate debate. Acceptance of a standard definition among surgeons is an important step for clinical audit and epidemiological research.

### Conclusion

No validated definition of anastomotic leak by site was found in the contemporary literature. One definition of anastomotic leak was proposed at a UK consensus workshop, but no evidence was found for its use other than in the original publication. There is a need for surgeons to agree a standard definition by anatomical site, that is valid and reliable. It should distinguish between clinically minor (radiological) and major anastomotic leaks after gastrointestinal surgery.

### Acknowledgements

This review was conducted within a wider systematic review of surgical adverse events funded by the NHS R & D Health Technology Assessment (HTA) Programme, project no. 97/16/04. The National Coordinating Centre for the HTA Programme has been informed of this submission.

### References

- Bardini R, Asolati M, Ruol A, Bonavina L, Baseggio S, Peracchia A. Anastomosis. *World J Surg* 1994; **18**: 373–8.
- Kayahara M, Nagakawa T, Ueno K, Ohta T, Miyazaki I. A new method of performing continuous intraabdominal drainage after pancreaticoduodenectomy. *Surg Today* 1995; **25**: 679–83.
- Petersen S, Freitag M, Hellmich G, Ludwig K. Anastomotic leakage: impact on local recurrence and survival in surgery of colorectal cancer. *Int J Colorectal Dis* 1998; **13**: 160–3.
- Thompson GA, Cocks JR, Collopy BT, Cade RJ, Ewing HP, Rogerson JW *et al*. Colorectal resection in Victoria: a comparison of hospital based and individual audit. *Aust N Z J Surg* 1996; **66**: 520–4.
- Peel AL, Taylor EW. Proposed definitions for the audit of postoperative infection: a discussion paper. Surgical Infection Study Group. *Ann R Coll Surg Engl* 1991; **73**: 385–8.
- Anikin VA, McManus KG, Graham AN, McGuigan JA. Total thoracic esophagectomy for esophageal cancer. *J Am Coll Surg* 1997; **185**: 525–9.
- Choi HK, Law S, Chu KM, Wong J. The value of neck drain in esophageal surgery: a randomized trial. *Dis Esophagus* 1998; **11**: 40–2.
- Craig SR, Walker WS, Cameron EW, Wightman AJ. A prospective randomized study comparing stapled with handsewn oesophago-gastric anastomoses. *J R Coll Surg Edinb* 1996; **41**: 17–19.
- Curry TK, Carter PL, Porter CA, Watts DM. Resectional gastric bypass is a new alternative in morbid obesity. *Am J Surg* 1998; **175**: 367–70.
- Deshmane VH, Shinde SR. The cervical esophago-gastric anastomotic leak. *Dis Esophagus* 1994; **7**: 42–6.
- Fernandez-Fernandez L, Tejero E, Tieso A. Influence of cartridge size on the morbidity of esophagojejunal anastomosis with EEA stapling devices. *Dig Surg* 1995; **12**: 235–7.
- Fernandez-Fernandez L, Tejero E, Tieso A. Randomized trial of fibrin glue to seal mechanical oesophagojejunal anastomosis. *Br J Surg* 1996; **83**: 40–1.
- Goel AK, Sinha S, Chattopadhyay TK. Role of gastrografin study in the assessment of anastomotic leaks from cervical oesophago-gastric anastomosis. *Aust N Z J Surg* 1995; **65**: 8–10.
- Gupta NM. Oesophagectomy without thoracotomy: first 250 patients. *Eur J Surg* 1996; **162**: 455–61.
- Gupta NM, Goenka MK, Behera A, Bhasin DK. Transhiatal oesophagectomy for benign obstructive conditions of the oesophagus. *Br J Surg* 1997; **84**: 262–4.
- Hansson LE, Gustavsson S, Haglund U. Postoperative morbidity and mortality after surgical treatment of advanced carcinoma of the oesophagus and the gastro-oesophageal junction. *Dig Surg* 1997; **14**: 506–11.
- Honkoop P, Siersema PD, Tilanus HW, Stassen LP, Hop WC, van Blankenstein M. Benign anastomotic strictures after transhiatal esophagectomy and cervical esophago-gastrostomy: risk factors and management. *J Thorac Cardiovasc Surg* 1996; **111**: 1141–6.
- Isozaki H, Okajima K. How to reduce surgical complications after extended gastric surgery. *Dig Surg* 1994; **11**: 78–85.
- Jacobi CA, Zieren HU, Zieren J, Muller JM. Is tissue oxygen tension during esophagectomy a predictor of esophago-gastric anastomotic healing? *J Surg Res* 1998; **74**: 161–4.
- Kuwano H, Matsushima T, Ikebe M, Baba K, Kitamura K, Toh Y *et al*. Mediastinal drainage prevents fatal pyothorax from anastomotic leakage after intrathoracic anastomosis in reconstruction for carcinoma of the esophagus. *Surg Gynecol Obstet* 1993; **177**: 131–4.
- Law S, Fok M, Chu KM, Wong J. Comparison of hand-sewn and stapled esophago-gastric anastomosis after esophageal resection for cancer: a prospective randomized controlled trial. *Ann Surg* 1997; **226**: 169–73.

- 22 Machens A, Busch C, Bause H, Izbicki JR. Gastric tonometry and drain amylase analysis in the detection of cervical oesophagogastric leakage. *Br J Surg* 1996; **83**: 1614–15.
- 23 Nambirajan L, Rintala RJ, Losty PD, Carty H, Lloyd DA. The value of early postoperative oesophagography following repair of oesophageal atresia. *Pediatr Surg Int* 1998; **13**: 76–8.
- 24 Obertop H, Bosscha K, De Graaf PW. Mediastinitis from anastomotic disruption after esophageal resection and reconstruction for cancer: results of salvage surgery. *Dis Esophagus* 1994; **7**: 184–7.
- 25 O'Rourke I, Tait N, Bull C, Gebiski V, Holland M, Johnson DC. Oesophageal cancer: outcome of modern surgical management. *Aust N Z J Surg* 1995; **65**: 11–16.
- 26 Pol B, LeTreut YP, Hardwigen J, Rosset E, Houvenaeghel G, Delpero JR. Mechanically stapled esophagojejunostomy. Results of a prospective series of 176 cases. *Hepatogastroenterology* 1997; **44**: 458–66.
- 27 Schardey HM, Joosten U, Finke U, Staubach KH, Schauer R, Heiss A *et al.* The prevention of anastomotic leakage after total gastrectomy with local decontamination. A prospective, randomized, double-blind, placebo-controlled multicenter trial. *Ann Surg* 1997; **225**: 172–80.
- 28 Schilling MK, Redaelli C, Maurer C, Friess H, Buchler MW. Gastric microcirculatory changes during gastric tube formation: assessment with laser Doppler flowmetry. *J Surg Res* 1996; **62**: 125–9.
- 29 Svanes K, Stangeland L, Viste A, Varhaug JE, Gronbech JE, Soreide O. Morbidity, ability to swallow, and survival, after oesophagectomy for cancer of the oesophagus and cardia. *Eur J Surg* 1995; **161**: 669–75.
- 30 Swails WS, Babineau TJ, Ellis FH, Kenler AS, Forse RA. The role of enteral jejunostomy feeding after esophago-gastrectomy: a prospective, randomized study. *Dis Esophagus* 1995; **8**: 193–9.
- 31 Thiede A, Geiger D, Dietz UA, Debus ES, Engemann R, Lexer GC *et al.* Overview on compression anastomoses: biofragmentable anastomosis ring multicenter prospective trial of 1666 anastomoses. *World J Surg* 1998; **22**: 78–86.
- 32 Thomas P, Fuentes P, Giudicelli R, Reboud E. Colon interposition for esophageal replacement: current indications and long-term function. *Ann Thorac Surg* 1997; **64**: 757–64.
- 33 Trentino P, Pompeo E, Nofroni I, Francioni F, Rapacchietta S, Silvestri F *et al.* Predictive value of early postoperative esophagoscopy for occurrence of benign stenosis after cervical esophagogastronomy. *Endoscopy* 1997; **29**: 840–4.
- 34 van Lanschot JJB, van Blankestein M, Oei HY, Tilanus HW. Randomized comparison of prevertebral and retrosternal gastric tube reconstruction after resection of oesophageal carcinoma. *Br J Surg* 1999; **86**: 102–8.
- 35 Vigneswaran WT, Trastek VF, Pairolero PC, Deschamps C, Daly RC, Allen MS. Transhiatal esophagectomy for carcinoma of the esophagus. *Ann Thorac Surg* 1993; **56**: 838–46.
- 36 Wu CW, Hsieh MC, Lo SS, Wang LS, Hsu WH, Lui WY *et al.* Morbidity and mortality after radical gastrectomy for patients with carcinoma of the stomach. *J Am Coll Surg* 1995; **181**: 26–32.
- 37 Zieren HU, Muller JM, Pichlmaier H. Prospective randomized study of one- or two-layer anastomosis following oesophageal resection and cervical oesophagogastronomy. *Br J Surg* 1993; **80**: 608–11.
- 38 Zilling T, Olseen P, Walther BS. Prediction of hospital stay after total gastrectomy. *Anticancer Res* 1997; **17**: 1355–9.
- 39 AhChong AK, Chiu KM, Law IC, Chu MK, Yip AW. Single-layer continuous anastomosis in gastrointestinal surgery: a prospective audit. *Aust N Z J Surg* 1996; **66**: 34–6.
- 40 Csendes A, Diaz JC, Burdiles P, Braghetto I, Maluenda F, Nava O *et al.* Classification and treatment of anastomotic leakage after extended total gastrectomy in gastric carcinoma. *Hepatogastroenterology* 1990; **37**(Suppl 2): 174–7.
- 41 Bottger TC, Junginger T, Yeo CJ. Factors influencing morbidity and mortality after pancreaticoduodenectomy: critical analysis of 221 resections. *World J Surg* 1999; **23**: 164–72.
- 42 Chou FF, Sheen-Chen SM, Chen YS, Chen MC, Chen CL. Postoperative morbidity and mortality of pancreaticoduodenectomy for periampullary cancer. *Eur J Surg* 1996; **162**: 477–81.
- 43 Davidson BR, Rai R, Kurzawinski TR, Selves L, Farouk M, Dooley JS *et al.* Prospective randomized trial of end-to-end versus side-to-side biliary reconstruction after orthotopic liver transplantation. *Br J Surg* 1999; **86**: 447–52.
- 44 Evans JD, Wilson PG, Carver C, Bramhall SR, Buckels JA, Mayer AD *et al.* Outcome of surgery for chronic pancreatitis. *Br J Surg* 1997; **84**: 624–9.
- 45 Gupta N, Solomon H, Fairchild R, Kaminski DL. Management and outcome of patients with combined bile duct and hepatic artery injuries. *Arch Surg* 1998; **133**: 176–81.
- 46 Hamanaka Y, Suzuki T. Total pancreatic duct drainage for leakproof pancreatojejunostomy. *Surgery* 1994; **115**: 22–6.
- 47 Hardy KJ, Wang BZ, Jones RM. Biliary complications after liver transplant: the Victorian experience. *Aust N Z J Surg* 1996; **66**: 162–5.
- 48 Howard JM. Pancreatojejunostomy leakage is a preventable complication of the Whipple resection. *J Am Coll Surg* 1997; **184**: 454–7.
- 49 Kapoor VK, Pradeep R, Haribhakti SP, Singh V, Sikora SS, Saxena R *et al.* Intrahepatic segment III cholangio-jejunostomy in advanced carcinoma of the gallbladder. *Br J Surg* 1996; **83**: 1709–11.
- 50 Lowy AM, Lee JE, Pisters PW, Davidson BS, Fenoglio CJ, Stanford P *et al.* Prospective, randomized trial of octreotide to prevent pancreatic fistula after pancreaticoduodenectomy for malignant disease. *Ann Surg* 1997; **226**: 632–41.
- 51 Matsusue S, Takeda H, Nakamura Y, Nishimura S, Koizumi S. A prospective analysis of the factors influencing pancreaticojejunostomy performed using a single method, in 100 consecutive pancreaticoduodenectomies. *Surg Today* 1998; **28**: 719–26.
- 52 Nagakawa T, Konishi I, Ueno K, Ohta T, Kayahara M, Miyazaki I. A comparison of the complication rate for three

- pancreaticojejunostomy techniques. *Hepatogastroenterology* 1997; **44**: 1452–6.
- 53 Reissman P, Perry Y, Cuenca A, Bloom A, Eid A, Shiloni E *et al.* Pancreaticojejunostomy versus controlled pancreaticocutaneous fistula in pancreaticoduodenectomy for periampullary carcinoma. *Am J Surg* 1995; **169**: 585–8.
- 54 Roder JD, Stein HJ, Bottcher KA, Busch R, Heidecke CD, Siewert JR. Stented versus nonstented pancreaticojejunostomy after pancreaticoduodenectomy: a prospective study. *Ann Surg* 1999; **229**: 41–8.
- 55 Berberat PO, Friess H, Uhl W, Buchler MW. The role of octreotide in the prevention of complications following pancreatic resection. *Digestion* 1999; **60**(Suppl 2): 15–22.
- 56 Ambrosetti P, Robert J, Mathey P, Rohner A. Left-sided colon and colorectal anastomoses: Doppler ultrasound as an aid to assess bowel vascularization. A prospective evaluation of 200 consecutive elective cases. *Int J Colorectal Dis* 1994; **9**: 211–14.
- 57 Biondo S, Jaurrieta E, Jorba R, Moreno P, Farran L, Borobia F *et al.* Intraoperative colonic lavage and primary anastomosis in peritonitis and obstruction. *Br J Surg* 1997; **84**: 222–5.
- 58 Bokey EL, Chapuis PH, Fung C, Hughes WJ, Koorey SG, Brewer D *et al.* Postoperative morbidity and mortality following resection of the colon and rectum for cancer. *Dis Colon Rectum* 1995; **38**: 480–7.
- 59 Bouillot JL, Aouad K, Badawy A, Alamowitch B, Alexandre JH. Elective laparoscopic-assisted colectomy for diverticular disease. A prospective study in 50 patients. *Surg Endosc* 1998; **12**: 1393–6.
- 60 Burke P, Mealy K, Gillen P, Joyce W, Traynor O, Hyland J. Requirement for bowel preparation in colorectal surgery. *Br J Surg* 1994; **81**: 907–10.
- 61 Cornwell EE III, Velmahos GC, Berne TV, Murray JA, Chahwan S, Asensio J *et al.* The fate of colonic suture lines in high-risk trauma patients: a prospective analysis. *J Am Coll Surg* 1998; **187**: 58–63.
- 62 De Wever I, Van de Moortel M, Stas M. Temporary colostomy in supralelevator pelvic exenteration. A comparative study between stapled loop and loop colostomy. *Eur J Surg Oncol* 1996; **22**: 84–7.
- 63 Debus ES, Sailer M, Geiger D, Dietz UA, Fuchs KH, Thiede A. Long-term results after 75 anastomoses in the upper extraperitoneal rectum with the biofragmentable anastomosis ring. *Dig Surg* 1999; **16**: 55–9.
- 64 Deen KL, Smart PJ. Prospective evaluation of sutured, continuous, and interrupted single layer colonic anastomoses. *Eur J Surg* 1995; **161**: 751–3.
- 65 Dehni N, Schlegel RD, Cunningham C, Guiguet M, Tiret E, Parc R. Influence of a defunctioning stoma on leakage rates after low colorectal anastomosis and colonic J pouch–anal anastomosis. *Br J Surg* 1998; **85**: 1114–17.
- 66 Docherty JG, McGregor JR, Akyol AM, Murray GD, Galloway DJ. Comparison of manually constructed and stapled anastomoses in colorectal surgery. West of Scotland and Highland Anastomosis Study Group. *Ann Surg* 1995; **221**: 176–84.
- 67 Fingerhut A, Elhadad A, Hay JM, Lacaine F, Flamant Y. Infraperitoneal colorectal anastomosis: hand-sewn versus circular staples. A controlled clinical trial. French Associations for Surgical Research. *Surgery* 1994; **116**: 484–90.
- 68 Fingerhut A, Hay JM, Elhadad A, Lacaine F, Flamant Y. Supraperitoneal colorectal anastomosis: hand-sewn versus circular staples – a controlled clinical trial. French Associations for Surgical Research. *Surgery* 1995; **118**: 479–85.
- 69 Hallbook O, Pahlman L, Krog M, Wexner SD, Sjodahl R. Randomized comparison of straight and colonic J pouch anastomosis after low anterior resection. *Ann Surg* 1996; **224**: 58–65.
- 70 Hansen O, Schwenk W, Hucke HP, Stock W. Colorectal stapled anastomoses. Experiences and results. *Dis Colon Rectum* 1996; **39**: 30–6.
- 71 Hida J, Yasutomi M, Fujimoto K, Okuno K, Ieda S, Machidera N *et al.* Functional outcome after low anterior resection with low anastomosis for rectal cancer using the colonic J-pouch. Prospective randomized study for determination of optimum pouch size. *Dis Colon Rectum* 1996; **39**: 986–91.
- 72 Iversen LH, Thomsen GH, Thorlacius-Ussing O. Systemic coagulation activation and anastomotic leakage after colorectal cancer surgery. *Dis Colon Rectum* 1999; **42**: 56–65.
- 73 Junger W, Junger WG, Miller K, Bahrami S, Redl H, Schlag G *et al.* Early detection of anastomotic leaks after colorectal surgery by measuring endotoxin in the drainage fluid. *Hepatogastroenterology* 1996; **43**: 1523–9.
- 74 Karanjia ND, Corder AP, Bearn P, Heald RJ. Leakage from stapled low anastomosis after total mesorectal excision for carcinoma of the rectum. *Br J Surg* 1994; **81**: 1224–6.
- 75 Kessler H, Hermanek P Jr, Wiebelt J. Operative mortality in carcinoma of the rectum. Results of the German Multicentre Study. *Int J Colorectal Dis* 1993; **8**: 158–66.
- 76 Kockerling F, Rose J, Schneider C, Scheidbach H, Scheuerlein H, Reymond MA *et al.* Laparoscopic colorectal anastomosis: risk of postoperative leakage: results of a multicenter study. *Surg Endosc* 1999; **13**: 639–44.
- 77 Kracht M, Hay JM, Fagniez PL, Fingerhut A. Ileocolonic anastomosis after right hemicolectomy for carcinoma: stapled or hand-sewn? A prospective, multicenter, randomized trial. *Int J Colorectal Dis* 1993; **8**: 29–33.
- 78 Mann B, Kleinschmidt S, Stremmel W. Prospective study of hand-sutured anastomosis after colorectal resection. *Br J Surg* 1996; **83**: 29–31.
- 79 Merad F, Hay JM, Fingerhut A, Yahchouchi E, Laborde Y, Pelissier E *et al.* Is prophylactic pelvic drainage useful after elective rectal or anal anastomosis? A multicenter controlled randomized trial. French Associations for Surgical Research. *Surgery* 1999; **125**: 529–35.
- 80 Merad F, Hay JM, Fingerhut A, Flamant Y, Molkhov JM, Laborde Y. Omentoplasty in the prevention of anastomotic

- leakage after colonic or rectal resection: a prospective randomized study in 712 patients. French Associations for Surgical Research. *Ann Surg* 1998; **227**: 179–86.
- 81 Miller K, Arrer E, Leitner C. Early detection of anastomotic leaks after low anterior resection of the rectum. *Dis Colon Rectum* 1996; **39**: 1081–5.
  - 82 Miller K, Moritz E. Circular stapling techniques for low anterior resection of rectal carcinoma. *Hepatogastroenterology* 1996; **43**: 823–31.
  - 83 Moore JW, Chapuis PH, Bokey EL. Morbidity and mortality after single- and double-stapled colorectal anastomoses in patients with carcinoma of the rectum. *Aust N Z J Surg* 1996; **66**: 820–3.
  - 84 Norris B, Solomon MJ, Eyers AA, West RH, Glenn DC, Morgan BP. Abdominal surgery in the older Crohn's population. *Aust N Z J Surg* 1999; **69**: 199–204.
  - 85 Pakkastie TE, Ovaska JT, Pekkala ES, Luukkonen PE, Jarvinen HJ. A randomised study of colostomies in low colorectal anastomoses. *Eur J Surg* 1997; **163**: 929–33.
  - 86 Redmond HP, Austin OM, Clery AP, Deasy JM. Safety of double-stapled anastomosis in low anterior resection. *Br J Surg* 1993; **80**: 924–7.
  - 87 Sagar PM, Hartley MN, Macfie J, Mancey-Jones B, Sedman P, May J. Randomized trial of pelvic drainage after rectal resection. *Dis Colon Rectum* 1995; **38**: 254–8.
  - 88 Santos JC Jr, Batista J, Sirimarco MT, Guimaraes AS, Levy CE. Prospective randomized trial of mechanical bowel preparation in patients undergoing elective colorectal surgery. *Br J Surg* 1994; **81**: 1673–6.
  - 89 Slim K, Pezet D, Riff Y, Clark E, Chipponi J. High morbidity rate after converted laparoscopic colorectal surgery. *Br J Surg* 1995; **82**: 1406–8.
  - 90 Stewart BT, Woods RJ, Collopy BT, Fink RJ, Mackay JR, Keck JO. Early feeding after elective open colorectal resections: a prospective randomized trial. *Aust N Z J Surg* 1998; **68**: 125–8.
  - 91 Tagart RE. Restorative rectal resection: an audit of 220 cases. *Br J Surg* 1986; **73**: 70–1.
  - 92 Watson AJM, Krukowski ZH, Munro A. Salvage of large bowel anastomotic leaks. *Br J Surg* 1999; **86**: 499–500.
  - 93 Wheeler JMD, Gilbert JM. Controlled intraoperative water testing of left-sided colorectal anastomoses: are ileostomies avoidable? *Ann R Coll Surg Engl* 1999; **81**: 105–8.
  - 94 Breen EM, Schoetz DJ Jr, Marcello PW, Roberts PL, Collier JA, Murray JJ *et al*. Functional results after perineal complications of ileal pouch–anal anastomosis. *Dis Colon Rectum* 1998; **41**: 691–5.
  - 95 Dayton MT, Larsen KP. Outcome of pouch-related complications after ileal pouch–anal anastomosis. *Am J Surg* 1997; **174**: 728–31.
  - 96 Flohr P, Hefty R, Paiss T, Hautmann R. The ileal neobladder – updated experience with 306 patients. *World J Urol* 1996; **14**: 22–6.
  - 97 Hrung JM, Levine MS, Rombeau JL, Rubesin SE, Laufer I. Total proctocolectomy and ileoanal pouch: the role of contrast studies for evaluating postoperative leaks. *Abdom Imaging* 1998; **23**: 375–9.
  - 98 Hulten L. Problems after ileo-pouch anal anastomosis for ulcerative colitis. How can we prevent it? What can we do? *Neth J Med* 1994; **45**: 80–5.
  - 99 Kartheuser AH, Parc R, Penna CP, Tiret E, Frileux P, Hannoun L *et al*. Ileal pouch–anal anastomosis as the first choice operation in patients with familial adenomatous polyposis: a ten-year experience. *Surgery* 1996; **119**: 615–23.
  - 100 Kelly IM, Bartram CI, Nicholls RJ. Water-soluble contrast pouchography – technique and findings in 85 patients. *Clin Radiol* 1994; **49**: 612–16.
  - 101 Richard CS, Cohen Z, Stern HS, McLeod RS. Outcome of the pelvic pouch procedure in patients with prior perianal disease. *Dis Colon Rectum* 1997; **40**: 647–52.
  - 102 Wexner SD, Taranow DA, Johansen OB, Itzkowitz F, Daniel N, Noguerras JJ *et al*. Loop ileostomy is a safe option for fecal diversion. *Dis Colon Rectum* 1993; **36**: 349–54.
  - 103 Thompson GA, Cocks JR, Collopy BT, Cade RJ, Ewing HP, Rogerson JW *et al*. Clinical indicators in colorectal surgery. *J Qual Clin Pract* 1996; **16**: 31–5.
